# Supplementary material
Source: PubMed Central journal article supplement (PMC6477919)

**A**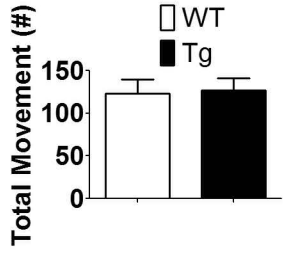**B**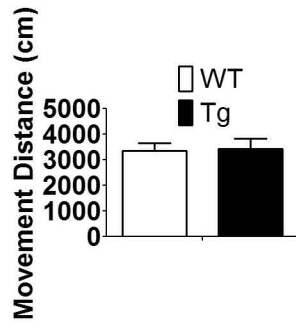**C**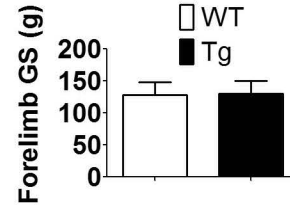**D**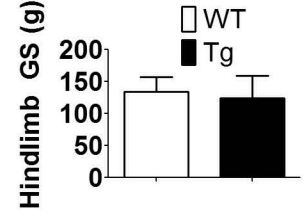**E**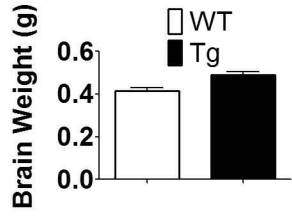**F**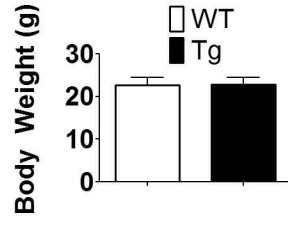

A

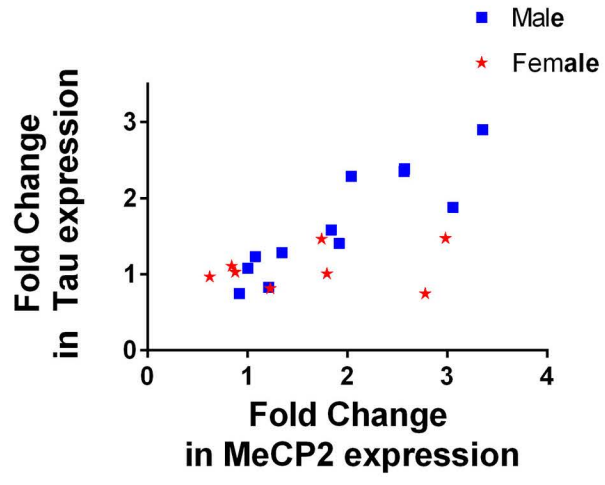

Supplement: NIHMS1023889-supplement-Supp_Figs.pdf [file NIHMS1023889-supplement-Supp_Figs.pdf]
